# Supplementary material
Source: PubMed Central journal article supplement (PMC6113483)
Supplement: zjm999096101s1.pdf [file zjm999096101s1.pdf]

Supplementary Information

| New ST | <i>adk</i> | <i>fumC</i> | <i>gyrB</i> | <i>icd</i> | <i>mdh</i> | <i>purA</i> | <i>recA</i> |
|--------|------------|-------------|-------------|------------|------------|-------------|-------------|
| 1      | 88         | 103         | 2           | 36         | 23         | 44          | 26          |
| 2      | 6          | 65          | 32          | 26         | New 1      | 8           | 2           |
| 3      | 13         | 13          | 9           | 13         | 16         | 126         | New 1       |
| 4      | 13         | 14          | 19          | 36         | 23         | 44          | 10          |
| 5      | 4          | 375         | 289         | 25         | 5          | 16          | 19          |
| 6      | 10         | 11          | 4           | 8          | 9          | 1           | 2           |
| 7      | 9          | 65          | 5           | 1          | 8          | 13          | 6           |
| 8      | New 1      | New 1       | 591         | 36         | 18         | 1           | 25          |
| 9      | 53         | 40          | 47          | 13         | 36         | New 1       | 29          |
| 10     | 13         | 24          | 19          | 14         | 16         | 1           | 10          |
| 11     | 13         | 13          | 9           | 13         | 23         | 10          | 9           |
| 12     | 88         | 103         | 19          | 36         | 23         | 11          | 26          |
| 13     | New 2      | 14          | 19          | 36         | 23         | 11          | 10          |
| 14     | 13         | 44          | 247         | 13         | 16         | New 2       | 34          |
| 15     | 36         | 24          | 9           | 13         | 17         | 11          | 430         |
| 16     | 6          | 65          | 32          | 26         | 11         | 8           | 6           |
| 17     | 36         | 24          | 9           | New 1      | 17         | 11          | 25          |
| 18     | 88         | 103         | 19          | 36         | 23         | New 3       | 26          |
| 19     | 13         | 96          | 9           | 13         | 17         | 44          | 96          |
| 20     | New 3      | 13          | 9           | 13         | 16         | 10          | 9           |
| 21     | New 4      | 90          | 54          | 10         | 1          | 35          | 47          |
| 22     | 13         | 13          | 9           | 13         | New 2      | 126         | 9           |
| 23     | 13         | 52          | 9           | 13         | 16         | 10          | 9           |
| 24     | 13         | 132         | 156         | 14         | New 3      | 25          | 17          |
| 25     | 35         | 24          | 2           | 27         | 37         | 5           | 4           |
| 26     | 690        | 4           | 19          | 36         | 23         | 11          | New 2       |
| 27     | 6          | 103         | 4           | 16         | 24         | 11          | 14          |
| 28     | 13         | 13          | 9           | 13         | 16         | 126         | New 3       |
| 29     | 15         | 24          | 10          | New 2      | 17         | 37          | 36          |
| 30     | 13         | 39          | 50          | 26         | 16         | 37          | 25          |

Supplemental Table 1. New sequence types isolated from canine urine in this study. Allele numbers of the known alleles of the new sequence types found in this study that could not be added to the Enterobase (<http://enterobase.warwick.ac.uk>) database due to cessation of acceptance of Sanger sequences to demonstrate new alleles and sequence types.

| <b>Primer Name</b> | <b>Primer Sequence (5' → 3')</b> | <b>Reference</b>                 |
|--------------------|----------------------------------|----------------------------------|
| papAF              | ATGGCAGTGGTGTCTTTTGGTG           | Johnson & Stell, 2000(S1)        |
| papAR              | CGTCCCACCATACGTGCTCTTC           | Johnson & Stell, 2000            |
| fyuAF              | TGATTAACCCCGCGACGGGAA            | Johnson & Stell, 2000            |
| fyuAR              | CGCAGTAGGCACGATGTTGTA            | Johnson & Stell, 2000            |
| ireAF              | GATGACTCAGCCACGGGTAA             | Rodriguez-Siek et al., 2005 (S2) |
| ireAR              | CCAGGACTCACCTCACGAAT             | Rodriguez-Siek et al., 2005      |
| kpsMTIIF           | GCGCATTTGCTGATACTGTTG            | Johnson & Stell, 2000            |
| kpsMTIIR           | AGGTAGTTCAGACTCACACCT            | Johnson & O'Bryan, 2004 (S3)     |
| kpsMTIIR2          | AGGCCGATGAACAGGGTGACCA           | This paper                       |
| papCF              | GTGGCAGTATGAGTAATGACCGTTA        | Johnson & Stell, 2000            |
| papCR              | ATATCCTTTCTGCAGGGATGCAATA        | Johnson & Stell, 2000            |
| sfa/focDEF         | CTCCGGAGAACTGGGTGCATCTTAC        | Johnson & Stell, 2000            |
| sfa/focDER         | CGGAGGAGTAATTACAAACCTGGCA        | Johnson & Stell, 2000            |
| afa/draBCF         | GGCAGAGGGCCGGCAACAGGC            | Johnson & Stell, 2000            |
| afa/draBCR         | CCCGTAACGCGCCAGCATCTC            | Johnson & Stell, 2000            |
| iutAF              | GGCTGGACATCATGGGAACTGG           | Johnson & Stell, 2000            |
| iutAR              | CGTCGGGAACGGGTAGAATCG            | Johnson & Stell, 2000            |

Supplemental Table 2. Primers used for virulence genotyping multiplex PCR

| Parameter                                                       | Total Number with Data Available For Parameter | Patient or Isolate Characteristic                    | N (% of total N with data for parameter) |            |
|-----------------------------------------------------------------|------------------------------------------------|------------------------------------------------------|------------------------------------------|------------|
| STs with ≥10 isolates                                           | 295                                            | 372                                                  | 64 (21.7)                                |            |
|                                                                 |                                                | 12                                                   | 19 (6.4)                                 |            |
|                                                                 |                                                | 73                                                   | 19 (6.4)                                 |            |
|                                                                 |                                                | 127                                                  | 12 (4.1)                                 |            |
|                                                                 |                                                | 131                                                  | 12 (4.1)                                 |            |
|                                                                 |                                                | 297                                                  | 11 (3.7)                                 |            |
| Most Frequent Breeds                                            | 292                                            | Mixed Breed Dog                                      | 66 (22.6)                                |            |
|                                                                 |                                                | Labrador                                             | 42 (14.4)                                |            |
|                                                                 |                                                | Golden Retriever                                     | 18 (6.2)                                 |            |
|                                                                 |                                                | German Shepherd Dog                                  | 12 (4.1)                                 |            |
|                                                                 |                                                | Beagle                                               | 11 (3.8)                                 |            |
|                                                                 |                                                | Boxer                                                | 9 (3.1)                                  |            |
|                                                                 |                                                | Yorkshire Terrier                                    | 8 (2.7)                                  |            |
|                                                                 |                                                | Pit Bull                                             | 8 (2.7)                                  |            |
| Age                                                             | 290                                            | Median (Interquartile Range) (years)                 | 9 (5 – 12)                               |            |
|                                                                 |                                                | Range                                                | 3 mo – 17 yr                             |            |
| Sex                                                             | 283                                            | Female                                               | Spayed                                   | 219 (77.4) |
|                                                                 |                                                |                                                      | Intact                                   | 184        |
|                                                                 |                                                |                                                      | Unknown Status                           | 14         |
|                                                                 |                                                | Male                                                 | Unknown Status                           | 21         |
|                                                                 |                                                |                                                      | Neutered                                 | 64 (22.6)  |
|                                                                 |                                                |                                                      | Intact                                   | 50         |
| Unknown Status                                                  | 8                                              |                                                      |                                          |            |
| Practice Type                                                   | 290                                            | Referral                                             | 6                                        |            |
| History of UTI                                                  | 259                                            | Known History                                        | 170 (58.6)                               |            |
| On Potentially Immunosuppressive Therapy                        | 146                                            | Total                                                | 114 (44.0)                               |            |
|                                                                 |                                                | Prednisone (unknown dose)                            | 45 (30.8)                                |            |
|                                                                 |                                                | Oclacitinib                                          | 20 (13.7)                                |            |
|                                                                 |                                                | Chemotherapy                                         | 8 (3.4)                                  |            |
|                                                                 |                                                | Cyclosporine                                         | 6 (4.1)                                  |            |
|                                                                 |                                                | Dexamethasone                                        | 4 (2.7)                                  |            |
|                                                                 |                                                | Budesonide                                           | 2 (1.4)                                  |            |
|                                                                 |                                                | Corticosteroid + cyclosporine                        | 1 (0.7)                                  |            |
|                                                                 |                                                | Corticosteroid + chemotherapy                        | 3 (2.1)                                  |            |
| On Antimicrobials at the Time of Urine Submission to Laboratory | 156                                            | Total                                                | 3 (2.1)                                  |            |
|                                                                 |                                                | Amoxicillin                                          | 34 (21.8)                                |            |
|                                                                 |                                                | Amoxicillin – Clavulanic Acid                        | 8 (5.1)                                  |            |
|                                                                 |                                                | Enrofloxacin                                         | 8 (5.1)                                  |            |
|                                                                 |                                                | Cefpodoxime                                          | 4 (2.6)                                  |            |
|                                                                 |                                                | Metronidazole                                        | 4 (2.6)                                  |            |
|                                                                 |                                                | Ampicillin                                           | 3 (1.9)                                  |            |
|                                                                 |                                                | Fosfomycin                                           | 3 (1.9)                                  |            |
|                                                                 |                                                | Trimethoprim-sulfa                                   | 2 (1.4)                                  |            |
|                                                                 |                                                | Doxycycline                                          | 2 (1.4)                                  |            |
|                                                                 |                                                | More than one drug                                   | 2 (1.4)                                  |            |
|                                                                 |                                                | Total                                                | 3 (2.0)                                  |            |
|                                                                 |                                                | Recent (within past month) History of Antimicrobials | 166                                      | Total      |
| Amoxicillin – Clavulanic Acid                                   | 15 (9.0)                                       |                                                      |                                          |            |
| Cefpodoxime                                                     | 10 (6.0)                                       |                                                      |                                          |            |
| Amoxicillin                                                     | 7 (4.2)                                        |                                                      |                                          |            |
| Antimicrobial Type Not Available                                | 6 (3.6)                                        |                                                      |                                          |            |
| Enrofloxacin                                                    | 6 (3.6)                                        |                                                      |                                          |            |
| Metronidazole                                                   | 5 (3.0)                                        |                                                      |                                          |            |
| Cephalexin                                                      | 2 (1.2)                                        |                                                      |                                          |            |
| Trimethoprim-Sulfa                                              | 2 (1.2)                                        |                                                      |                                          |            |

|                          |     |                                            |           |
|--------------------------|-----|--------------------------------------------|-----------|
|                          |     | Doxycycline                                | 2 (1.2)   |
|                          |     | Clindamycin                                | 1 (0.6)   |
|                          |     | Cefovecin                                  | 1 (0.6)   |
|                          |     | Ciprofloxacin                              | 1 (0.6)   |
|                          |     | Ampicillin                                 | 1 (0.6)   |
|                          |     | More than one drug                         | 7 (4.2)   |
| Neurologic Disease       | 161 | Total                                      | 34 (21.1) |
|                          |     | Myelopathy and/or paraplegia (unspecified) | 10 (6.2)  |
|                          |     | Paraparesis, disease unknown               | 4 (2.5)   |
|                          |     | Discospondylitis                           | 4 (2.5)   |
|                          |     | Intervertebral disk disease                | 4 (2.5)   |
|                          |     | Seizures                                   | 2 (1.2)   |
|                          |     | Brain Tumor (unspecified)                  | 2 (1.2)   |
|                          |     | Fibrocartilaginous embolism                | 1 (0.6)   |
|                          |     | Spinal fracture                            | 1 (0.6)   |
|                          |     | Spinal mass (unspecified)                  | 1 (0.6)   |
|                          |     | Cranial aspergillosis                      | 1 (0.6)   |
|                          |     | Multiple Diseases                          | 2 (1.3)   |
| Urogenital Tract Disease | 108 | Total                                      | 43 (39.8) |
|                          |     | Polyuria                                   | 12 (11.1) |
|                          |     | Uroliths and/or nephroliths                | 6 (5.6)   |
|                          |     | Chronic Kidney Disease                     | 5 (4.6)   |
|                          |     | Diabetes Mellitus                          | 4 (3.7)   |
|                          |     | Abnormal vulvar conformation               | 4 (3.7)   |
|                          |     | Ectopic Ureter                             | 3 (2.8)   |
|                          |     | Bladder Mass                               | 3 (2.8)   |
|                          |     | Bladder thickened (ultrasound)             | 1 (0.9)   |
|                          |     | Protein-losing nephropathy                 | 1 (0.9)   |
|                          |     | Preputial abnormality                      | 1 (0.9)   |
|                          |     | Urethral avulsion                          | 1 (0.9)   |
|                          |     | Urethral stent                             | 1 (0.9)   |
|                          |     | Enlarged kidney                            | 1 (0.9)   |
| Cancer                   | 111 | Total                                      | 27 (27.0) |
|                          |     | Bladder mass (TCC or unspecified)          | 12 (10.8) |
|                          |     | Brain Tumor (unspecified)                  | 3 (2.7)   |
|                          |     | Lymphosarcoma                              | 3 (2.7)   |
|                          |     | Osteosarcoma                               | 3 (2.7)   |
|                          |     | Thymoma                                    | 2 (1.8)   |
|                          |     | Pulmonary (unspecified)                    | 2 (1.8)   |
|                          |     | Hepatocellular carcinoma                   | 1 (0.9)   |
|                          |     | Spinal Meningioma                          | 1 (0.9)   |
|                          |     | Multiple Myeloma                           | 1 (0.9)   |
|                          |     | Mast Cell Tumor                            | 1 (0.9)   |
|                          |     | Mammary carcinoma                          | 1 (0.9)   |

Supplemental Table 3. Summary of patient and population characteristics of dogs with *E. coli* urinary tract infections included in this study (all sources combined). Some patients may fall into multiple sub-categories for patient characteristics, so total number in subgroups may exceed the total number of animals with that parameter.

|                                                               | <b>NDSU VDL</b> | <b>OSU VMC</b> | <b>IADDL<br/>Purdue</b> | <b>UCD<br/>VMTH</b> | <b>WADDL<br/>WSU</b> |
|---------------------------------------------------------------|-----------------|----------------|-------------------------|---------------------|----------------------|
| Total Number of Isolates                                      | 44              | 31             | 64                      | 97                  | 59                   |
| Frequency of ST372 (%)                                        | 20              | 12.5           | 34.4                    | 17.5                | 20.4                 |
| Median VG Score<br>(Interquartile range)                      | 4 (2-5)         | 2.5 (1-5)      | 2 (1-4)                 | 4 (2-5)             | 3 (1-4)              |
| Number of ExPEC (%)                                           | 30 (66.7)       | 16 (50)        | 31 (48.4)               | 61(63)              | 32 (54.2)            |
| Simpson's Diversity (1- <i>D</i> )                            | 0.90            | 0.88           | 0.93                    | 0.83                | 0.92                 |
| Dogs Examined by Specialty<br>Service (%)                     | 0               | 22 (71)        | 35 (54.7)               | 87 (90)             | 25 (42.3)            |
| Patients with Previous Urine<br>Submissions to Laboratory (%) | 6 (13.3)        | 10 (32.3)      | 18 (28.1)               | 31 (32)             | 10 (16.9)            |
| Known History of UTI (%)                                      | 15 (33.3)       | 10 (32.3)      | 22 (34.4)               | 40 (41.2)           | 27 (45.8)            |
| Known to Be on Antibiotics at<br>Submission (%)               | 2 (4.4)         | 9 (29)         | 8 (12.5)                | 13 (13.4)           | 2 (3.4)              |

Supplemental Table 4. Descriptive statistics by laboratory source of isolates

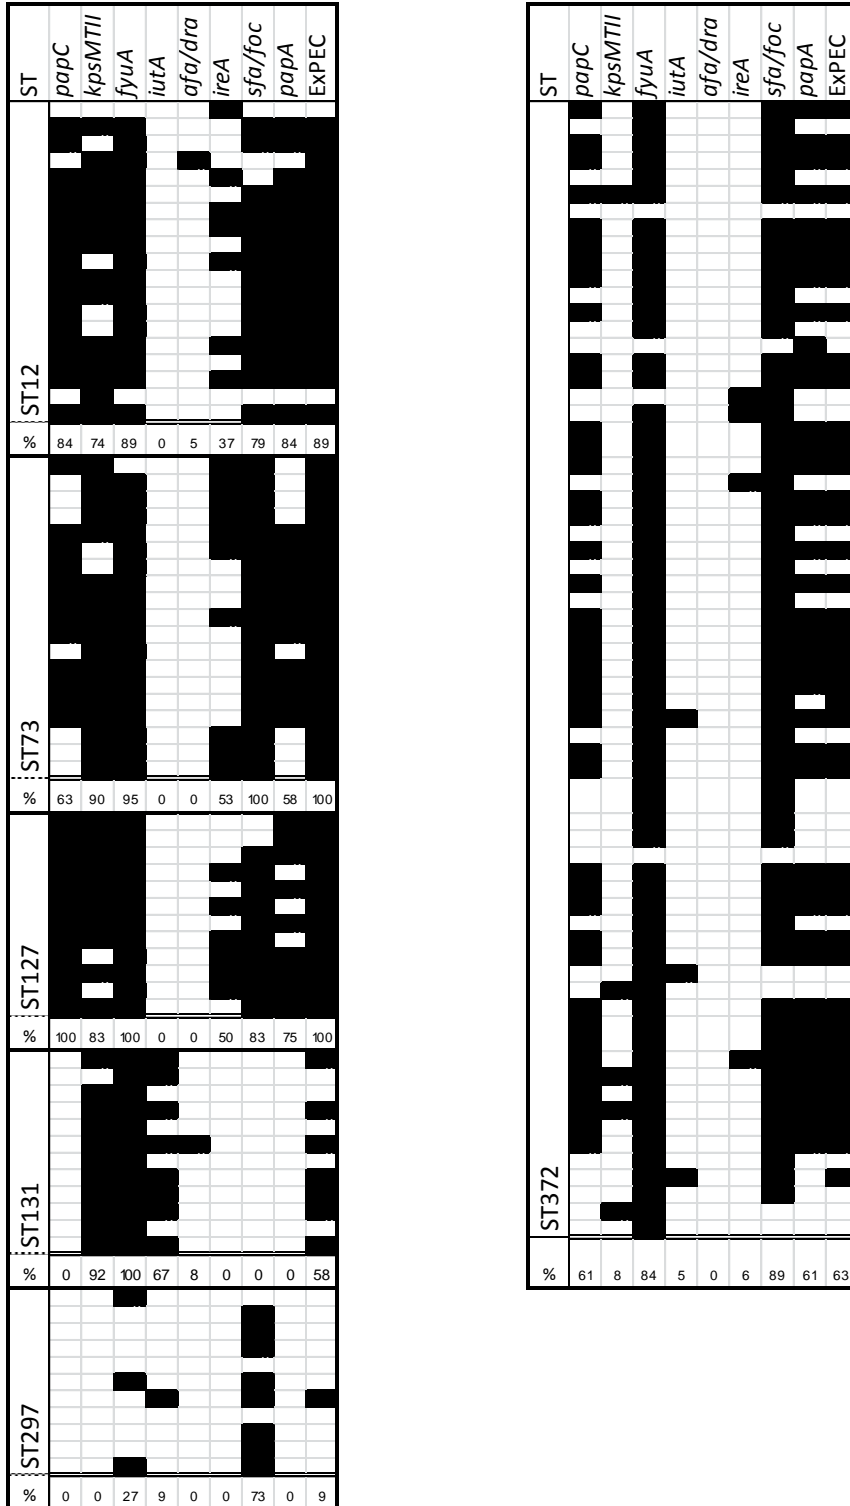

Supplemental Figure 1. Distribution of virulence-associated genes in the six most prevalent *E. coli* STs isolated from canine UTIs. Each row represents an individual isolate of the labeled ST (total n=138). Black fill = detection of that gene or ExPEC status.

## Supplemental References

- S1. Johnson JR, Stell AL. 2000. Extended Virulence Genotypes of *Escherichia coli* Strains from Patients with Urosepsis in Relation to Phylogeny and Host Compromise. *J Infect Dis* 181:261–272.
- S2. Rodriguez-Siek KE, Giddings CW, Doetkott C, Johnson TJ, Fakhr MK, Nolan LK. 2005. Comparison of *Escherichia coli* isolates implicated in human urinary tract infection and avian colibacillosis. *Microbiology* 151:2097–2110.
- S3. Johnson JR, O'Bryan TT. 2004. Detection of the *Escherichia coli* Group 2 Polysaccharide Capsule Synthesis Gene *kpsM* by a Rapid and Specific PCR-Based Assay. *J Clin Microbiol* 42:1773–1776.
